# Supplementary material for: Relationship of blood urea nitrogen levels with 28-day mortality among critically ill individuals diagnosed with central venous catheter-associated infections
Source: Research Square preprint supplement (doi:10.21203/rs.3.rs-6573275/v1), 2025-05-29
Supplement: Supplementary file 1 [file b474244511dc5e64688f5ed8.docx]

Table S1 Association Between BUN and 28-day Mortality in Different Groups

| BUN ((mg/dL)) | n.total | n.event_% | Crude model | | Adjusted model | |
| --- | --- | --- | --- | --- | --- | --- |
| HR (95%CI) | *P* value | HR (95%CI) | *P* value |
| BUN (mg/dL) | 263 | 40 (15.2) | 1.02 (1.01~1.03) | <0.001 | 1.02 (1.01~1.03) | 0.001 |
| Q1(≤15) | 60 | 1 (1.7) | 1(Ref) |  | 1(Ref) |  |
| Q2(15-28) | 65 | 5 (7.7) | 4.72 (0.55~40.44) | 0.156 | 2.81 (0.31~25.13) | 0.356 |
| Q3(28-46) | 69 | 12 (17.4) | 11.31 (1.47~87) | 0.02 | 6.59 (0.8~54.13) | 0.079 |
| Q4(46-159) | 69 | 22 (31.9) | 22.31 (3.01~165.6) | 0.002 | 11.45 (1.43~91.72) | 0.022 |
| P for trend | 263 | 40 (15.2) | 2.35 (1.63~3.38) | <0.001 | 2.04 (1.37~3.05) | <0.001 |

Adjust for age, sex, race, CCI，SOFA score，Sepsis, Acute kidney injury 2 day, mechanical ventilation, RRT, vasoactive drug use

Abbreviations: Q, quartile; HR, hazard ratio; Cl, confidence interval; Ref, reference; CCI, Charlson comorbidity index
